# Supplementary material
Source: Springer Nature journal article supplement (https://www.springermedizin.de/resource/supplementary/13002_2012_268_MOESM1_ESM.pdf/9627522)

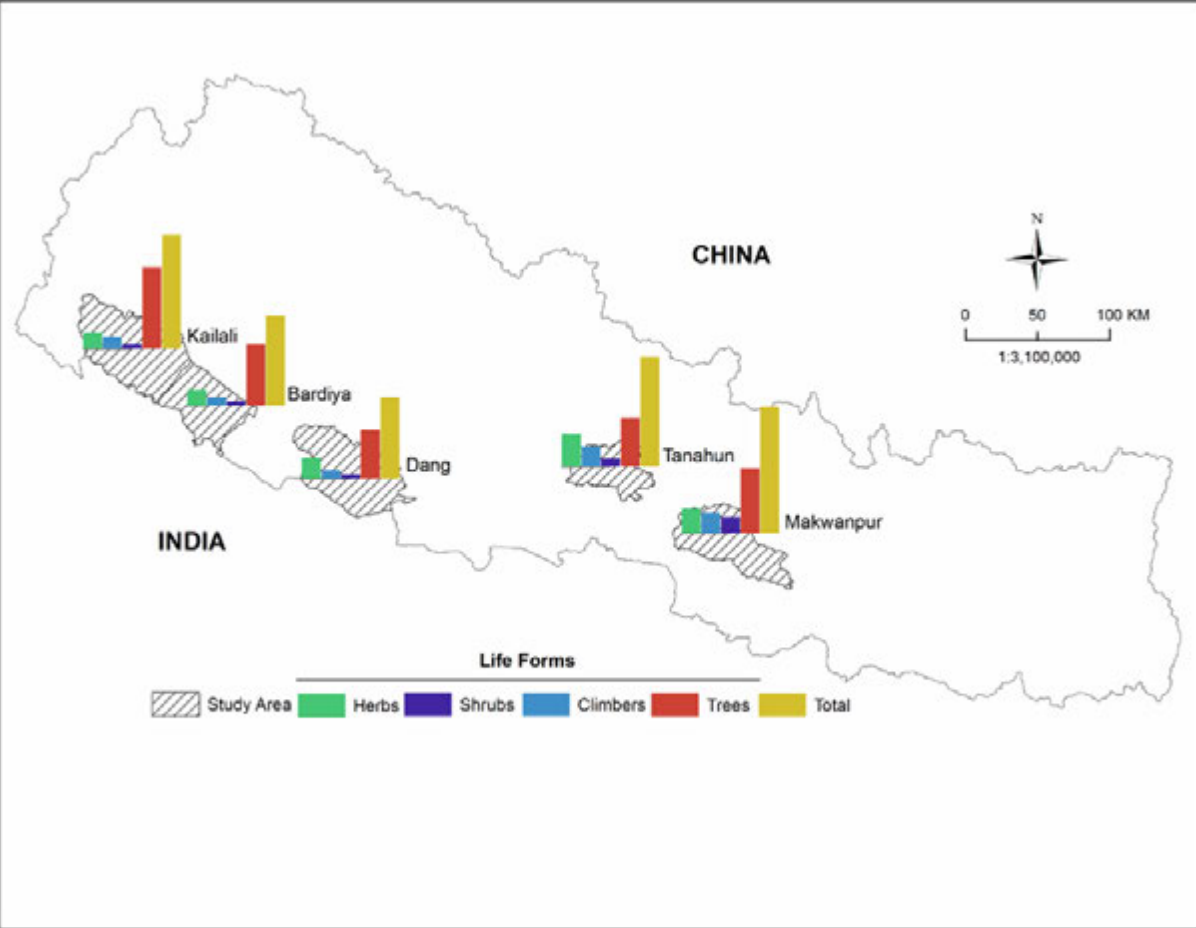

Supplement: MOESM1 [file 9627522]
